# Supplementary material for: Suberoylanilide hydroxamic acid suppresses hepatic stellate cells activation by HMGB1 dependent reduction of NF-κB1
Source: PeerJ. 2015 Nov 3;3:e1362. doi: 10.7717/peerj.1362 (PMC4636417; doi:10.7717/peerj.1362)
Supplement: Table S1 [file peerj-03-1362-s001.xlsx]

## Sheet: Sheet1
Supplementary Table 1. siRNA sequences and primers for RT-PCR
Target Gene		Primer sequence (5' to 3')
HMGB1 SiRNA #1	sense	GGACAACCCCGUUAUGAAdTdT
	antisense	UUCAUAACGGGCCUUGUCCdTdT
HMGB1 SiRNA #2	sense	GUUGUUCUGUUAACUGAAUdTdT
	antisense	AUUCAGUUAACAGAACAACdTdT
siRNA negative control	sense	UUCUCCCAACGUGUCACGUTT
	antisense	ACGUGACACGUUCCCAGAATT
Collagen Ⅰ	sense	GTGCGAGACGTGATCTGTGA
	antisense	TTGGTCGGTGGGTGACTCTG
α-SMA	sense	CTTGGACTCTGTGCCCTCATC
	antisense	TGGCTCTTTCATCGGGTTTAG
HMGB1	sense	AGCATAAGAAGAAGCACCCAGAT
	antisense	GGGCGATACTCAGAGCAGAAG
NF-κB1 (p50)	sense	GGATTTCGTTTCCGTTATGTATG
	antisense	TGTCCTTGGGTCCAGCAGTT
GAPDH	sense	AGGTCATCCACGACCACTTC
	antisense	GTGAGTTTCCCGTTCAGCTC
