# Supplementary material for: Suberoylanilide hydroxamic acid suppresses hepatic stellate cells activation by HMGB1 dependent reduction of NF-κB1
Source: PeerJ. 2015 Nov 3;3:e1362. doi: 10.7717/peerj.1362 (PMC4636417; doi:10.7717/peerj.1362)
Supplement: Table S3 [file peerj-03-1362-s003.xlsx]

## Sheet: Sheet1
Supplementary Table 4. Top 10 Canonical Pathways of Up-regulated Genes in SAHA treated LX2 cells
Ingenuity Canonical Pathways	-log(p-value)	Ratio	Molecules
Germ Cell-Sertoli Cell Junction Signaling	2.99	4.85E-02	PIK3R3,PLS1,SORBS1,TUBA4A,JUP,GSN,RAB8B,TUBB2B
Remodeling of Epithelial Adherens Junctions	2.75	7.35E-02	TUBA4A,DNM3,MAPRE2,MAPRE3,TUBB2B
VDR/RXR Activation	2.47	6.17E-02	SERPINB1,SPP1,CYP24A1,IL1RL1,PRKCH
Eicosanoid Signaling	1.73	4.94E-02	PLA2G4A,AKR1C3,PTGS1,PTGER2
Gap Junction Signaling	1.67	3.39E-02	PIK3R3,TUBA4A,PRKCH,ITPR1,GUCY1B3,TUBB2B
p70S6K Signaling	1.64	3.85E-02	PIK3R3,F2RL2,PPM1J,PRKCH,PLD1
ErbB Signaling	1.63	0.046	PIK3R3,ERBB4,PRKCH,AREG/AREGB
UVB-Induced MAPK Signaling	1.52	5.45E-02	PIK3R3,RPS6KA5,PRKCH
PPAR Signaling	1.49	3.81E-02	IL1RL1,NGFR,PDGFD,PPARGC1A
Epithelial Adherens Junction Signaling	1.38	3.38E-02	SORBS1,TUBA4A,JUP,MYL1,TUBB2B
