# Supplementary material for: Suberoylanilide hydroxamic acid suppresses hepatic stellate cells activation by HMGB1 dependent reduction of NF-κB1
Source: PeerJ. 2015 Nov 3;3:e1362. doi: 10.7717/peerj.1362 (PMC4636417; doi:10.7717/peerj.1362)
Supplement: Table S4 [file peerj-03-1362-s004.xlsx]

## Sheet: Sheet1
Supplementary Table 5. Top 10 Canonical Pathways of Down-regulated Genes in SAHA treated LX2 cells
Ingenuity Canonical Pathways	-log(p-value)	Ratio	Molecules
HMGB1 Signaling	4.37	6.06E-02	RHOD,PIK3CG,RHOJ,NFKB1,KAT6B,TNFRSF11B
ILK Signaling	4.32	4.12E-02	TGFB1I1,PARVA,RHOD,PIK3CG,CREBBP,VEGFC,RHOJ,NFKB1
Ceramide Signaling	3.55	5.62E-02	PIK3CG,SPHK1,NFKB1,NSMAF,TNFRSF11B
Production of Nitric Oxide and Reactive Oxygen Species	3.53	3.32E-02	MAP3K6,RHOD,PIK3CG,CREBBP,RHOJ,NFKB1,TNFRSF11B
Tec Kinase Signaling	2.32	2.75E-02	RHOD,PIK3CG,GTF2I,RHOJ,NFKB1
Signaling by Rho Family GTPases	2.28	2.36E-02	RHOD,PIK3CG,RHOJ,CDC42EP1,NFKB1,CLIP1
HIF1α Signaling	2.23	3.7E-02	TP53,PIK3CG,CREBBP,VEGFC
Lymphotoxin β Receptor Signaling	2.18	4.92E-02	PIK3CG,CREBBP,NFKB1
Sphingosine-1-phosphate Signaling	2.11	3.31E-02	RHOD,PIK3CG,SPHK1,RHOJ
RAR Activation	2.1	2.63E-02	NSD1,SMAD9,PIK3CG,CREBBP,NFKB1
